# Supplementary material for: Local, non-systemic, and minimally invasive therapies for calcinosis cutis: a systematic review
Source: PubMed Central journal article supplement (PMC9232439; doi:10.1007/s00403-021-02264-5), 2021-06-24
Supplement: 403_2021_2264_MOESM1_ESM.pdf [file 403_2021_2264_MOESM1_ESM.pdf]

**Local, non-systemic, and minimally invasive therapies for calcinosis cutis:  
a systematic review**

**Journal:** Archives of Dermatological Research

**Authors (ORCID iDs):** Joanna Nowaczyk (0000-0001-7438-3559)<sup>a</sup>, Michał Zawistowski (0000-0002-5173-6283)<sup>a</sup>, Piotr Fiedor, MD, PhD, Prof.<sup>a</sup>

<sup>a</sup>Department of General and Transplantation Surgery, Medical University of Warsaw, Warsaw, Poland

**Corresponding author:** Piotr Fiedor, MD, PhD, Prof., Department of General and Transplantation Surgery, Medical University of Warsaw, Nowogrodzka 59, 02-006 Warsaw, Poland, email: piotr.fiedor@wp.pl

## Supplementary Content

**Table S1.** Search queries used to collect the data

| <b>Database</b>       | <b>Search query</b>                                                                                                                                                           | <b>Filters</b> | <b>Date of last search</b> | <b>Number of records</b> |
|-----------------------|-------------------------------------------------------------------------------------------------------------------------------------------------------------------------------|----------------|----------------------------|--------------------------|
| <b>Pubmed</b>         | ((Calcinosis[MeSH Terms] AND Skin[MeSH Terms]) OR (calci* cutis)) AND ("sodium thiosulfate"[Supplementary Concept] OR Lithotripsy[MeSH Terms] OR "Laser Therapy"[MeSH Terms]) | none           | March 14, 2021             | 153                      |
| <b>Embase</b>         | 'skin calcification'/exp AND ('sodium thiosulfate'/exp OR 'extracorporeal shock wave lithotripsy'/exp OR 'laser'/exp)                                                         | none           | March 14, 2021             | 128                      |
| <b>Web of Science</b> | ((skin calcification) AND ((sodium thiosulfate) OR (extracorporeal shock wave lithotripsy) OR ESWL OR laser))                                                                 | none           | March 14, 2021             | 129                      |

**Table S2.** Risk of bias assessment with the Joanna Briggs Institute Critical Appraisal tools.

| Study                                 | Study design                                 | Q1 <sup>a</sup> | Q2 | Q3 | Q4 | Q5 | Q6 | Q7 | Q8 | Q9 | Q10 | Q11 | Q12 | Q13 | Overall risk <sup>b</sup> |
|---------------------------------------|----------------------------------------------|-----------------|----|----|----|----|----|----|----|----|-----|-----|-----|-----|---------------------------|
| Topical sodium thiosulfate            |                                              |                 |    |    |    |    |    |    |    |    |     |     |     |     |                           |
| Abott et al. (2020)                   | Case report                                  | ✓               | ✗  | ✓  | ✓  | ✓  | ✓  | ?  | ✓  |    |     |     |     |     | Moderate                  |
| von Hodenberg et al. (2020)           | Case series                                  | ✓               | ✓  | ✓  | ✓  | ✓  | ✗  | ?  | ?  | ✗  | NA  |     |     |     | High                      |
| Bhari and Bharti (2019)               | Case report                                  | ✓               | ✗  | ✓  | ?  | ?  | ✗  | ✗  | ✓  |    |     |     |     |     | High                      |
| Ma et al. (2019)                      | Case series                                  | ✓               | ✓  | ✓  | ✓  | ✓  | ✓  | ✓  | ✓  | ✓  | ✓   |     |     |     | Low                       |
| Karthik et al. (2019)                 | Case report                                  | ✓               | ✗  | ✓  | ✓  | ?  | ?  | ✗  | ✗  |    |     |     |     |     | High                      |
| Tajalli et al. (2019)                 | Case report                                  | ✓               | ✗  | ✓  | ✓  | ✓  | ✓  | ✓  | ✓  |    |     |     |     |     | Low                       |
| Topham et al. (2019)                  | Case report                                  | ✓               | ✗  | ✓  | ✓  | ✗  | ✗  | ✗  | ✓  |    |     |     |     |     | High                      |
| García-García et al. (2017)           | Case report                                  | ✓               | ✗  | ✓  | ✓  | ✓  | ✓  | ✓  | ✓  |    |     |     |     |     | Low                       |
| Jost et al. (2016)                    | Case series                                  | ✓               | ✓  | ✓  | ✓  | ✓  | ✓  | ✓  | ✓  | ✓  | NA  |     |     |     | Low                       |
| Urretavizcaya et al. (2016)           | Case series                                  | ?               | ?  | ✓  | ?  | ?  | ?  | ?  | ?  | ?  | NA  |     |     |     | High                      |
| Pagnini et al. (2014)                 | Case report                                  | ✓               | ✗  | ✓  | ✓  | ?  | ✓  | ✗  | ✓  |    |     |     |     |     | Moderate                  |
| Perez-Moreno et al. (2014)            | Case report                                  | ✓               | ✗  | ?  | ?  | ?  | ?  | ?  | ✓  | ✓  |     |     |     |     | High                      |
| Wolf et al. (2008)                    | Case report                                  | ✓               | ✗  | ✓  | ✓  | ✓  | ✓  | ?  | ✓  |    |     |     |     |     | Moderate                  |
| Intralesional sodium thiosulfate      |                                              |                 |    |    |    |    |    |    |    |    |     |     |     |     |                           |
| López-Sundh et al. (2020)             | Case report                                  | ?               | ✓  | ✓  | ✓  | ✓  | ✓  | ✓  | ✓  |    |     |     |     |     | Low                       |
| Olesen and Fage (2020)                | Case series                                  | ✓               | ✓  | ?  | ✓  | ✗  | ✓  | ?  | ?  | ✓  | ✗   |     |     |     | Moderate                  |
| Winter et al. (2020)                  | Double-blind, placebo-controlled pilot study | ✓               | ✓  | ✓  | ✓  | ✓  | ✓  | ✓  | ✗  | ✓  | ✓   | ✓   | ✓   | ✓   | Low                       |
| Tonial et al. (2018)                  | Case series                                  | ✓               | ✓  | ?  | ?  | ?  | ?  | ?  | ✓  | ✓  | ✓   |     |     |     | Moderate                  |
| Goossens et al. (2017)                | Case series                                  | ✗               | ✓  | ✓  | ?  | ?  | ✓  | ✓  | ✓  | ✓  | NA  |     |     |     | Moderate                  |
| Gunasekera et al. (2017)              | Case report                                  | ✓               | ✗  | ✓  | ✓  | ✓  | ✓  | ✓  | ✓  |    |     |     |     |     | Low                       |
| Oh et al. (2017)                      | Case report                                  | ✓               | ✗  | ?  | ?  | ?  | ?  | ?  | ✗  | ✗  |     |     |     |     | High                      |
| Baumgartner-Nielsen and Olesen (2016) | Case series                                  | ✗               | ✓  | ?  | ✓  | ✓  | ?  | ✓  | ✓  | ?  | NA  |     |     |     | Moderate                  |
| Smith (2013)                          | Case report                                  | ✓               | ✗  | ✓  | ✓  | ✓  | ✓  | ✓  | ✓  |    |     |     |     |     | Low                       |
| CO <sub>2</sub> laser                 |                                              |                 |    |    |    |    |    |    |    |    |     |     |     |     |                           |
| Cannarozzo et al. (2020)              | Case series                                  | ✓               | ✓  | ?  | ?  | ?  | ?  | ✗  | ✓  | ✓  | NA  |     |     |     | High                      |
| Aristazabal et al. (2019)             | Case report                                  | ?               | ✓  | ✓  | ✓  | ✓  | ✓  | ✗  | ✓  |    |     |     |     |     | Low                       |
| Weig et al. (2019)                    | Case report                                  | ✓               | ✗  | ✓  | ✓  | ✓  | ✓  | ?  | ✓  |    |     |     |     |     | Moderate                  |
| Zarate et al. (2017)                  | Case report                                  | ✓               | ✗  | ✓  | ✓  | ✓  | ?  | ?  | ✓  |    |     |     |     |     | Moderate                  |
| Kutlubay et al. et al. (2014)         | Case report                                  | ✓               | ✗  | ✓  | ✓  | ✓  | ✓  | ✓  | ✓  |    |     |     |     |     | Low                       |
| Joo et al. (2004)                     | Case report                                  | ✓               | ✗  | ✓  | ✓  | ✗  | ?  | ✗  | ✓  |    |     |     |     |     | Moderate                  |
| Chamberlain and Walker (2003)         | Case report                                  | ✓               | ✗  | ?  | ?  | ✓  | ?  | ✓  | ✓  |    |     |     |     |     | Moderate                  |
| Paek et al. (1996)                    | Case report                                  | ✓               | ✗  | ✓  | ✓  | ?  | ?  | ✗  | ✓  |    |     |     |     |     | Moderate                  |

|                                                                                    |             |   |   |   |   |   |   |   |   |   |    |  |          |
|------------------------------------------------------------------------------------|-------------|---|---|---|---|---|---|---|---|---|----|--|----------|
| Bottomley et al. (1996)                                                            | Case series | ✓ | ? | ? | ? | ? | ✓ | ✓ | ✓ | ✓ | NA |  | Moderate |
| Er:YAG laser                                                                       |             |   |   |   |   |   |   |   |   |   |    |  |          |
| Meissner et al. (2010)                                                             | Case report | X | X | X | X | X | X | X | ✓ |   |    |  | High     |
| Diode laser                                                                        |             |   |   |   |   |   |   |   |   |   |    |  |          |
| Wollina (2012)                                                                     | Case report | ✓ | X | ? | X | ✓ | ? | X | ✓ |   |    |  | High     |
| Picosecond + CO <sub>2</sub> laser                                                 |             |   |   |   |   |   |   |   |   |   |    |  |          |
| Abrouk et al. (2020)                                                               | Case report | ✓ | X | ? | X | ✓ | X | X | ? |   |    |  | High     |
| Extracorporeal shock wave lithotripsy                                              |             |   |   |   |   |   |   |   |   |   |    |  |          |
| Delgado-Márquez et al. (2014)                                                      | Case report | ✓ | X | ✓ | ✓ | ? | ✓ | ? | ✓ |   |    |  | Moderate |
| Sultan-Bichat et al. (2011)                                                        | Case series | ✓ | ✓ | ? | ✓ | ? | ✓ | ✓ | ✓ | ✓ | NA |  | Moderate |
| Chan and Li (2005)                                                                 | Case report | ✓ | X | ✓ | ✓ | ✓ | ? | ✓ | ✓ |   |    |  | Moderate |
| Sparsa et al. (2005)                                                               | Case report | ✓ | X | ? | ✓ | ? | ? | ✓ | ✓ |   |    |  | Moderate |
| Extracorporeal shock wave lithotripsy followed by intralesional sodium thiosulfate |             |   |   |   |   |   |   |   |   |   |    |  |          |
| Pavlov-Dolijanovic et al. (2018)                                                   | Case report | ✓ | X | ✓ | ✓ | ? | ? | ✓ | ✓ |   |    |  | Moderate |
| Picosecond laser followed by topical sodium thiosulfate                            |             |   |   |   |   |   |   |   |   |   |    |  |          |
| Eleryan et al. (2019)                                                              | Case series | ✓ | ? | ✓ | X | ? | ? | ✓ | ✓ | ✓ | NA |  | Moderate |

Abbreviations: Q, question.

Legend: ✓, Yes; X, No; ?, Unclear; NA, not applicable.

<sup>a</sup>Questions based on the JBI risk assessment checklists (see: <https://joannabriggs.org/critical-appraisal-tools>) for respective study designs.

<sup>b</sup>Overall risk of bias judgement was ranked as low in case >75% of questions were answered "Yes", high if the prevalence was <50%, and moderate otherwise.
